# Supplementary material
Source: publisher figshare collection journal article supplement (https://karger.figshare.com/ndownloader/files/28297572)

**Fig. S1. Flow diagram.** Cr, creatinine; eGFR, estimated glomerular filtration rate; RRT, renal replacement treatment.


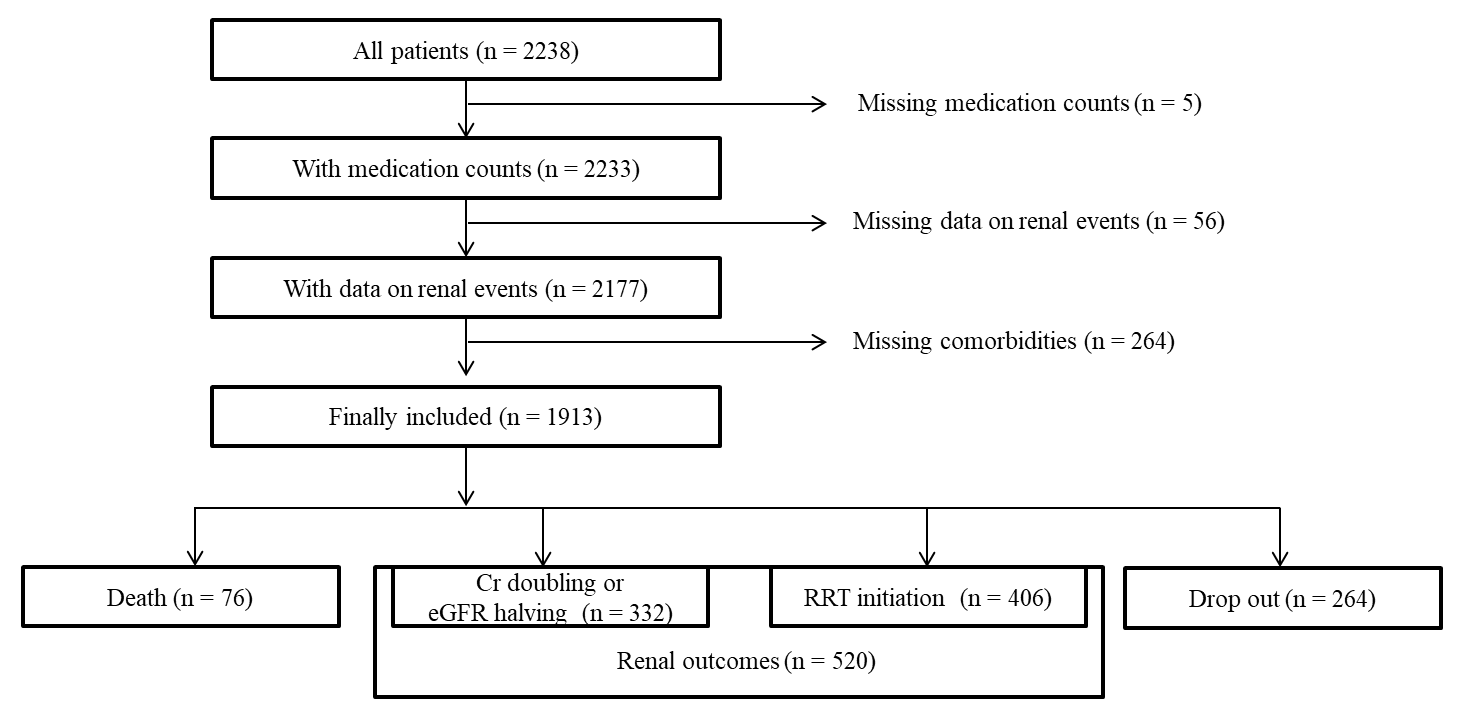

Supplement: Supplementary file 1 [file 28297572]
